# Supplementary material for: Three-dimensional microfluidic tape-paper-based sensing device for blood total bilirubin measurement in jaundiced neonates
Source: Royal Society of Chemistry journal article supplement (doi:10.1039/c9lc00939f), 2019-12-10
Supplement: c9lc00939f1.pdf [file c9lc00939f1.pdf]

## Electronic Supplementary Information

### Neonatal Jaundice Diagnostics on a Chip: 3D Microfluidic Tape-paper-based Sensing Device for Blood Total Bilirubin Measurement

*Weirui Tan<sup>1</sup>, Liyuan Zhang<sup>1,2,\*</sup>, James C. G. Doery<sup>3,4</sup>, Wei Shen<sup>1,\*</sup>*

1. Department of Chemical Engineering, Monash University, Wellington Road, Clayton, VIC 3800, Australia

2. National Local Joint Engineering Laboratory for Advanced Textile Processing and Clean Production, Science and Technology Institute, Wuhan Textile University, Wuhan 430200, China

3. Monash Pathology, Monash Health, Clayton Road, VIC 3168, Australia

4. Department of Medicine, Monash University, Wellington Road, Clayton, VIC 3800, Australia

\* Corresponding authors: [wei.shen@monash.edu](mailto:wei.shen@monash.edu), [liyuan.zhang@monash.edu](mailto:liyuan.zhang@monash.edu)

**The diazo reaction mechanism of total bilirubin (unconjugated bilirubin (UCB) and conjugated bilirubin (CB))**

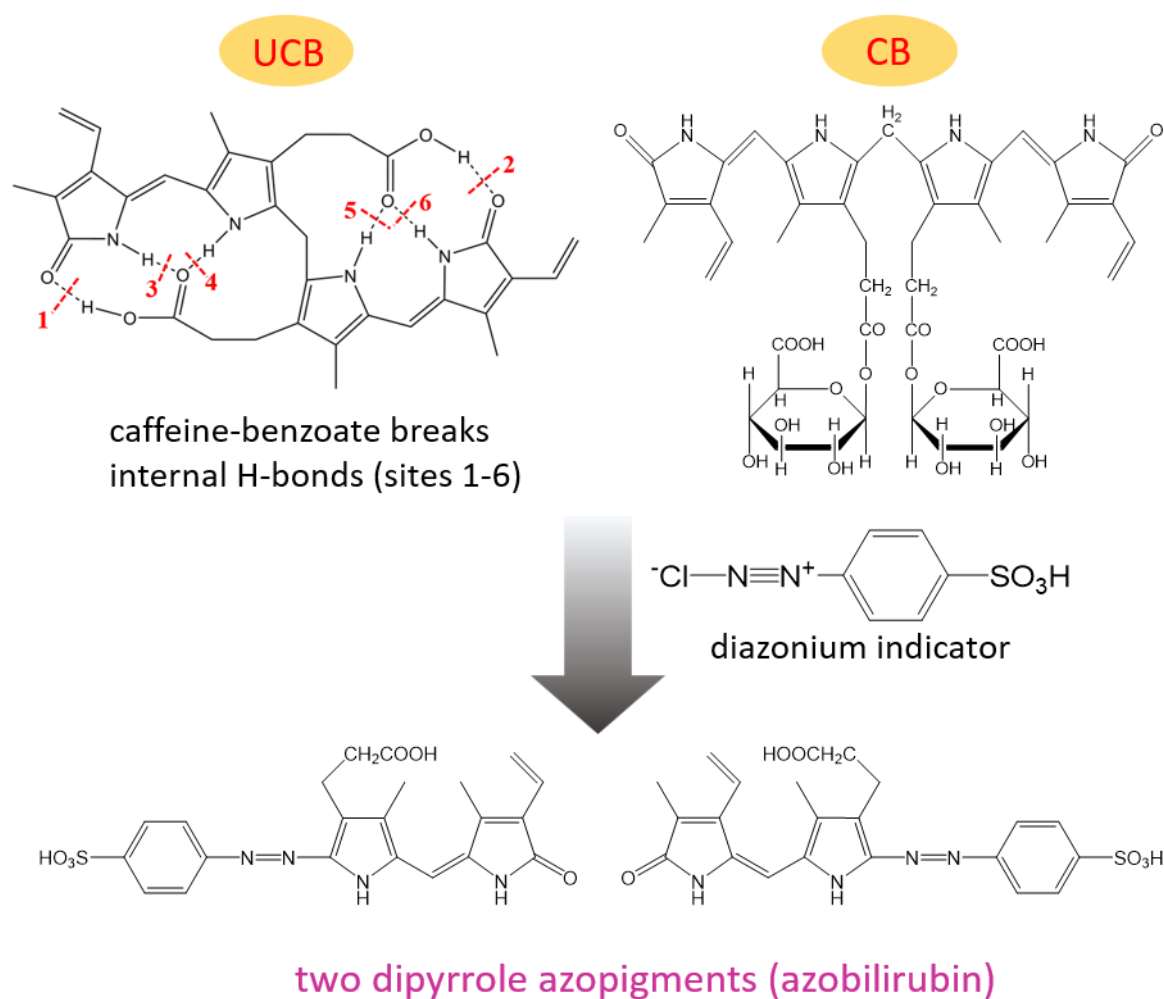

**Fig. S1** The reaction principle of diazotization of unconjugated bilirubin (UCB) and conjugated bilirubin (CB) to generate two purple dipyrrole azopigments (azobilirubin products).

**Modified Lucas-Washburn equation to describe the aqueous liquid transport in swellable cellulose fibre networks**

$$L_{lf} = \sqrt{\frac{\gamma R_0 \cos \theta}{2\mu}} \sqrt{\frac{3R_0^2 t + a^2 t^3 - 3aR_0 t^2}{3R_0^2}} \quad (S1)$$

where  $L_{lf}$  is the length of the advancing liquid-front within the porous medium (mm);  $\gamma$  is the liquid surface tension,  $\theta$  is the contact angle,  $\mu$  is the liquid viscosity,  $t$  is time,  $a$  is the pore radius reduction rate (a constant ratio related to the rate of decreasing pore radius, the reciprocal of time with the unit of 1/s),  $R_0$  is the initial pore radius. In this modified equation, the effect of gravity is negligible. The modified Lucas-Washburn equation works when the wicking time is not greater than the maximum-permitted swelling time for individual fibers.<sup>1</sup>

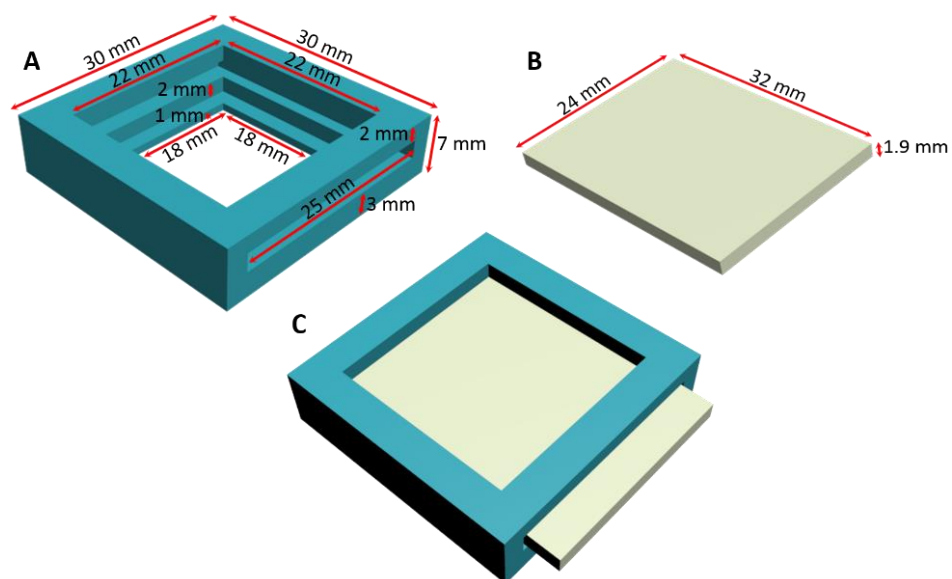

**Fig. S2** The schematic demonstration of the 3D-printed mould: (A) the accommodation mould; (B) the sliding block; (C) the assembled mould.

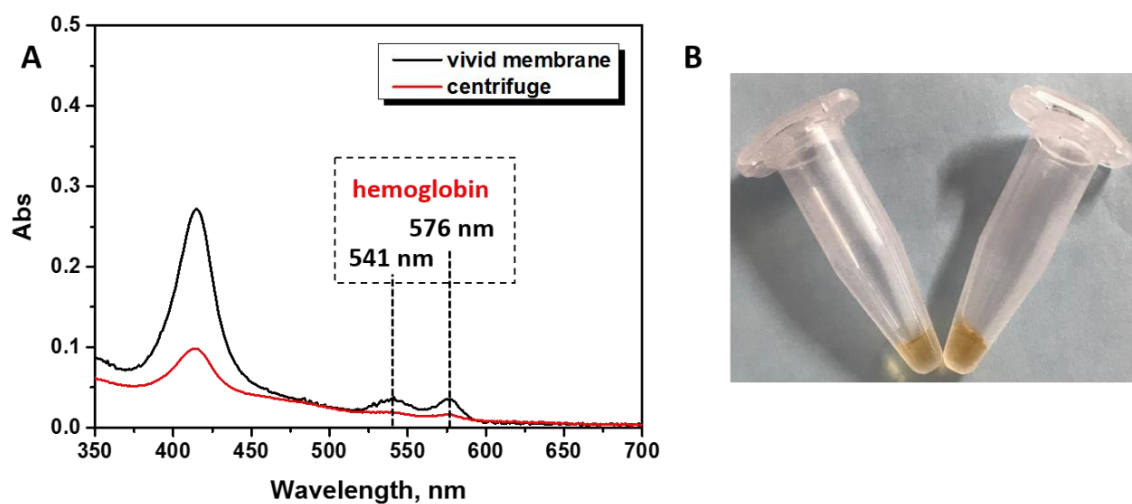

**Fig. S3** Comparison of the hemolysis in the plasma extracted by the vivid membrane and centrifuge. (A) The UV-vis absorbance spectra of plasma extracted by the vivid membrane and the centrifugation method. (B) Photos of plasma gained by centrifuge (left) and the vivid membrane (right).

**Table S1.** Consensus-based bilirubin thresholds for the management of babies of 38 weeks or more gestational age with high concentration of bilirubin.<sup>2</sup>

| Age (hours) | Bilirubin measurement (micromol/litre)     |                                                                   |                    |                                                                                                                        |
|-------------|--------------------------------------------|-------------------------------------------------------------------|--------------------|------------------------------------------------------------------------------------------------------------------------|
| 0           |                                            |                                                                   | > 100              | > 100                                                                                                                  |
| 6           | > 100                                      | > 112                                                             | > 125              | > 150                                                                                                                  |
| 12          | > 100                                      | > 125                                                             | > 150              | > 200                                                                                                                  |
| 18          | > 100                                      | > 137                                                             | > 175              | > 250                                                                                                                  |
| 24          | > 100                                      | > 150                                                             | > 200              | > 300                                                                                                                  |
| 30          | > 112                                      | > 162                                                             | > 212              | > 350                                                                                                                  |
| 36          | > 125                                      | > 175                                                             | > 225              | > 400                                                                                                                  |
| 42          | > 137                                      | > 187                                                             | > 237              | > 450                                                                                                                  |
| 48          | > 150                                      | > 200                                                             | > 250              | > 450                                                                                                                  |
| 54          | > 162                                      | > 212                                                             | > 262              | > 450                                                                                                                  |
| 60          | > 175                                      | > 225                                                             | > 275              | > 450                                                                                                                  |
| 66          | > 187                                      | > 237                                                             | > 287              | > 450                                                                                                                  |
| 72          | > 200                                      | > 250                                                             | > 300              | > 450                                                                                                                  |
| 78          |                                            | > 262                                                             | > 312              | > 450                                                                                                                  |
| 84          |                                            | > 275                                                             | > 325              | > 450                                                                                                                  |
| 90          |                                            | > 287                                                             | > 337              | > 450                                                                                                                  |
| 96+         |                                            | > 300                                                             | > 350              | > 450                                                                                                                  |
| Action      | ↓                                          | ↓                                                                 | ↓                  | ↓                                                                                                                      |
|             | Repeat bilirubin measurement in 6–12 hours | Consider phototherapy and repeat bilirubin measurement in 6 hours | Start phototherapy | Perform an exchange transfusion unless the bilirubin level falls below threshold while the treatment is being prepared |

**Table S2.** Cost estimation for development of one tape-paper-based sensing device, which should be less than AUD 0.6.

| Item                       | Market price per quantity                           | Quantity per PAD                                   | Cost per device, A\$ |
|----------------------------|-----------------------------------------------------|----------------------------------------------------|----------------------|
| bilirubin assay kit        | A\$ 430/1260 tests                                  | 1 test (10 $\mu$ L)                                | 0.341                |
| filter paper               | A\$ 45/(63.585 cm <sup>2</sup> $\times$ 100 sheets) | 1.5 $\times$ 1.5 cm <sup>2</sup> $\times$ 2 pieces | 0.032                |
| plasma separation membrane | A\$ 56/(619.5 cm <sup>2</sup> $\times$ 10 sheets)   | 2 $\times$ 2 cm <sup>2</sup>                       | 0.036                |
| 3M Scotch magic tape       | A\$ 5.6/(19 mm $\times$ 33 m)                       | 19 mm $\times$ 0.07 m                              | 0.012                |
| caffeine                   | A\$ 47.5/100g                                       | 0.85 mg                                            | 0.0004               |
| sodium benzoate            | A\$ 72.5/250g                                       | 0.85 mg                                            | 0.0002               |
| wax printing               |                                                     |                                                    | 0.0001 estimated     |
| 3D-printed resin mould     |                                                     |                                                    | < 0.1 estimated      |
|                            |                                                     |                                                    | 0.5217               |
| <b>Total</b>               |                                                     |                                                    | <b>~ 0.6</b>         |

## REFERENCES

- 1 D. R. Schuchard and J. C. Berg, *Wood and Fiber Science*, 1991, **23**, 342-357.
- 2 The neonatal jaundice clinical guideline can be viewed or downloaded through the link:  
<https://www.nice.org.uk/guidance/cg98/evidence/full-guideline-245411821>.
